# Supplementary material for: Multiscale-Engineered Muscle Constructs: PEG Hydrogel Micro-Patterning on an Electrospun PCL Mat Functionalized with Gold Nanoparticles
Source: MDPI journal article supplement (doi:10.3390/ijms23010260), 2021-12-27
Supplement: s1 [file s1]

## Supplementary Information for Publication

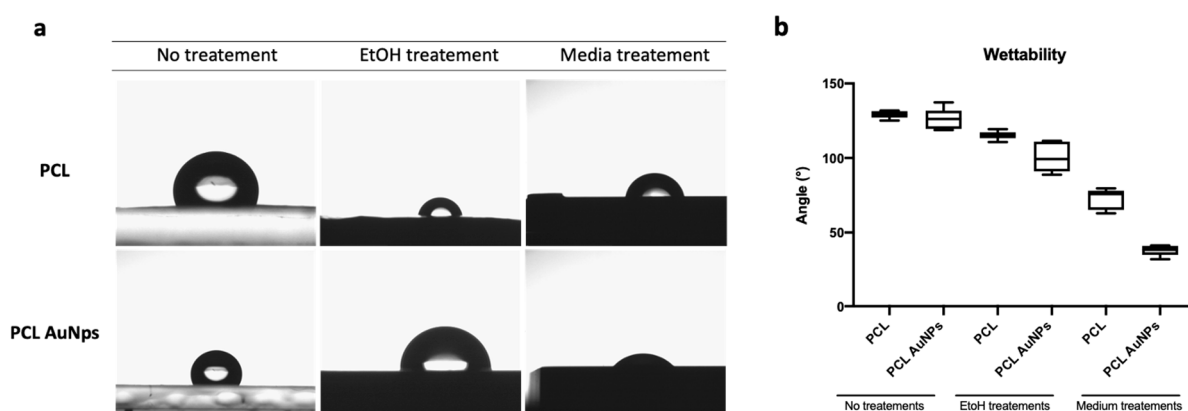

Figure S1. Wettability measurements for PCL and PCL Au NPS untreated/treated with EtOH or media by contact angle. The images (a) show the water attached to the untreated and treated substrates 1 minute after the dropping. Graph (c) gives the contact angles measured for the specimens. Data are displayed as median, quartiles, 5- and 95-percentiles ( $n=6$ ,  $p < 0.01$ ).

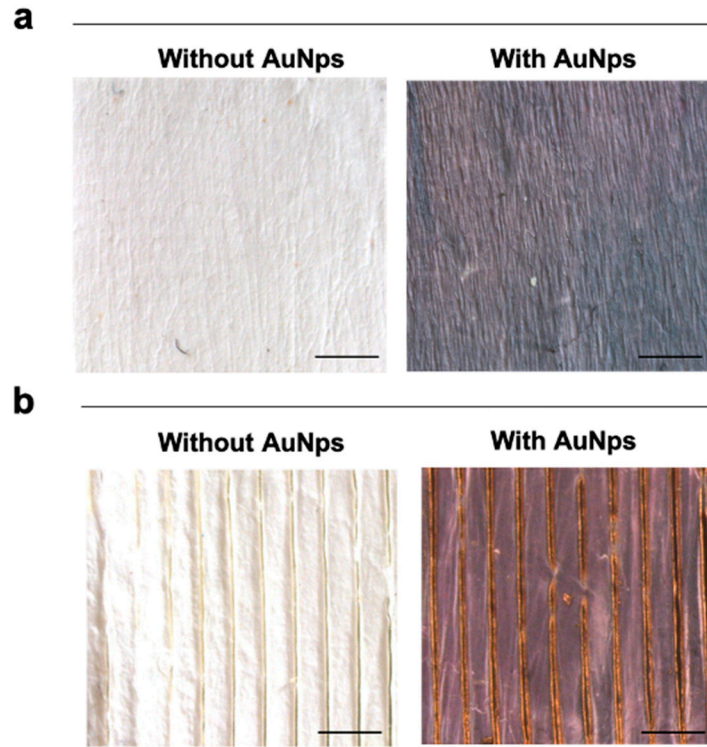

**Figure S2.** (a) Picture of electrospun PCL and with gold nanoparticles, (b) with micro patterned lines with a spacing of 500  $\mu\text{m}$ .

| Wet Scaffold   | Sheet Resistance<br>( $\text{K}\Omega/\text{cm}$ ) | Conductivity<br>( $\Omega^{-1}/\text{cm}^{-1}$ ) |
|----------------|----------------------------------------------------|--------------------------------------------------|
| PCL            | 49,43                                              | 2,02E-05                                         |
| PCL-Au Nps     | 13,06                                              | 7,65E-05                                         |
| PCL-Au Nps-PEG | 19,96                                              | 5,00E-05                                         |

**Figure S3.** conductivity of the scaffolds coated obtained by using two-point probes methods.

| Gene                 | Reference Number | Sequence<br>(Forward/Reverse)                                | Product<br>Length<br>(bp) |
|----------------------|------------------|--------------------------------------------------------------|---------------------------|
| RP2β<br>(aka polr2b) | NM_153798.2      | F: GATCCGTATCAGGTTCATGTCTGTA<br>R: CGGCATTCGCACCAAGGAA       | 123                       |
| Myogenin             | NM_031189        | F: CAACCCAGGAGATCATTTGCT<br>R: TGACAGACAATCTCAGTTGGG         | 145                       |
| MYOD                 | NM_010866.2      | F: CATTCCAACCCACAGAAC<br>R: GCGGATAGAAGCTCCATA               | 125                       |
| IGF-I                | NM_010512        | F: CATCGTCTTTAGGAGTGTTTGTTT<br>R: TAGAATGTTATTGATAAAGGACCAAC | 98                        |
| Desmin               | NM_010043.2      | F: ATGAGACCATCGCGGCTAAG<br>R: TTGGCTGCCTGAGTCAAGTC           | 82                        |
| MYH3 Emb             | NM_001099635.1   | F: CTACAACAGATGCGGACGGT<br>R: CAGTGCAGAGACGGTTTGGA           | 77                        |

**Table S1.** Real-Time qPCR Primer Details.
